# Supplementary material for: Personalised and Sustainable IEQ Monitoring: Use of Multi-Modal and Pervasive Technologies
Source: MDPI journal article supplement (doi:10.3390/ijerph20064897), 2023-03-10

## Supplementary Material

**Supplementary Material Figure S1.** Study location detailing sensor locations, as well as light, heating and ventilation sources.

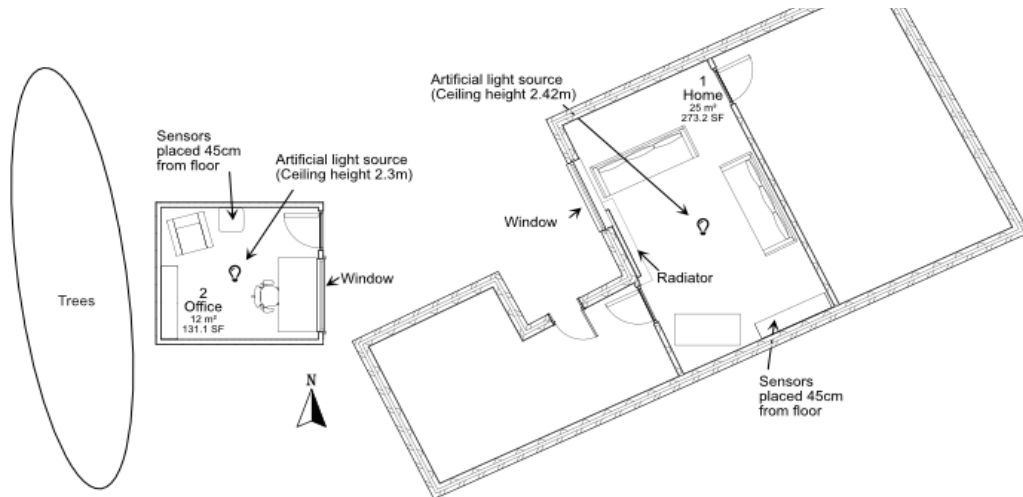

**Supplementary Material Figure S2.** Outline of the VoiceFlow application showing the visual script used to create the Alexa Skill

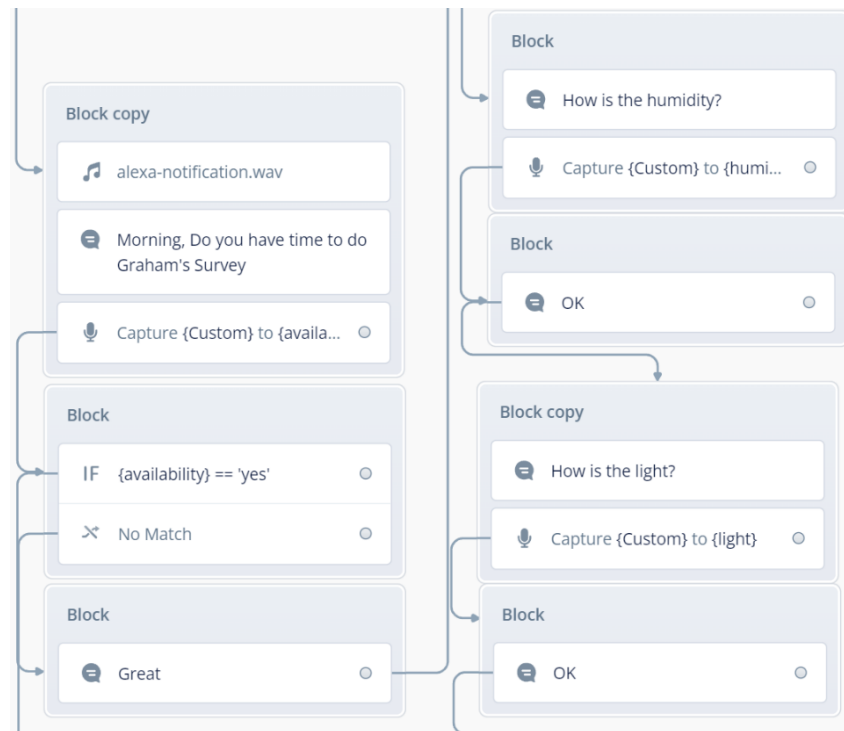

**Supplementary Material Table S1.** Descriptive statistics for quantitative data

|                      | N      | Minimum | Maximum   | Mean     | Std. Deviation |
|----------------------|--------|---------|-----------|----------|----------------|
| HOME_TEMP (°C)       | 168849 | 16.85   | 32.36     | 25.10    | 1.81           |
| HOME_RH (%)          | 168785 | 25.30   | 59.00     | 41.44    | 4.89           |
| HOME_LIGHT (lx)      | 168851 | 0.00    | 650.00    | 10.72    | 31.29          |
| HOME_SOUND (dBA)     | 168846 | 34.30   | 87.42     | 39.09    | 3.05           |
| HOME_CO2 (ppm)       | 168851 | 390.00  | 1,317.00  | 572.27   | 141.20         |
| HOME_eCO2 (ppm)      | 168851 | 400.00  | 7,992.00  | 1,187.73 | 1,111.21       |
| HOME_PM25 (µg/m3)    | 168851 | 0.00    | 212.00    | 1.10     | 4.84           |
| OFFICE_TEMP (°C)     | 154396 | 3.64    | 42.17     | 22.02    | 6.57           |
| OFFICE_RH (%)        | 154362 | 13.43   | 57.95     | 36.00    | 5.38           |
| OFFICE_LIGHT (lx)    | 154396 | 0.00    | 26,460.00 | 177.40   | 839.41         |
| OFFICE_SOUND (dBA)   | 122532 | 24.86   | 109.62    | 45.23    | 15.17          |
| OFFICE_CO2 (ppm)     | 154396 | 258.00  | 2,644.50  | 618.18   | 191.85         |
| OFFICE_eCO2 (ppm)    | 154396 | 400.00  | 7,992.00  | 595.56   | 459.93         |
| OFFICE_PM25 (µg/m3)  | 154396 | 0.00    | 141.00    | 0.89     | 2.38           |
| Outdoor Humidity (%) | 205016 | 21.00   | 100.00    | 77.00    | 15.45          |
| Outdoor Temp (°C)    | 205016 | -2.89   | 27.01     | 10.70    | 5.42           |
| Air Quality Index    | 205016 | 1.00    | 4.00      | 1.42     | 0.57           |
| Step Count           | 205016 | 0.00    | 218.00    | 5.78     | 18.75          |
| Heart Rate           | 205016 | 39.00   | 160.00    | 65.435   | 11.21          |

**Supplementary Material Figure S3.** Randomly selected sun map for the study location to give an idea of where the sun (yellow circle) would be throughout the day in relation to the buildings and rooms.

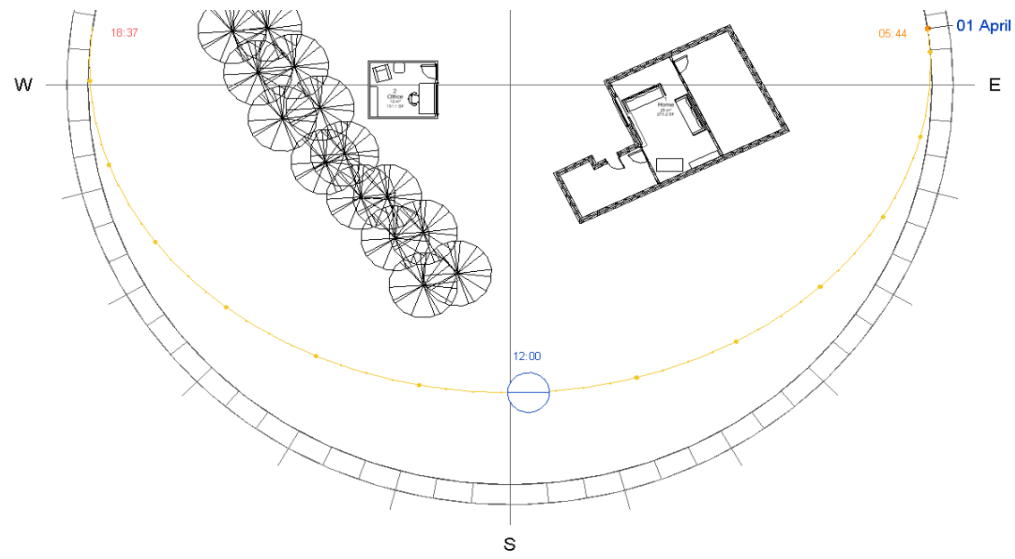

Supplement: s1 [file s1]
